# Supplementary material for: A watershed classification approach that looks beyond hydrology: application to a semi-arid, agricultural region in Canada
Source: Copernicus journal article supplement (doi:10.5194/hess-23-3945-2019), 2019-09-25
Supplement: Supplementary file 1 [file hess-23-3945-2019-supplement.pdf]

Supplement of Hydrol. Earth Syst. Sci., 23, 3945–3967, 2019  
<https://doi.org/10.5194/hess-23-3945-2019-supplement>  
© Author(s) 2019. This work is distributed under  
the Creative Commons Attribution 4.0 License.

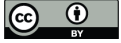

*Supplement of*

## **A watershed classification approach that looks beyond hydrology: application to a semi-arid, agricultural region in Canada**

**Jared D. Wolfe et al.**

*Correspondence to:* Jared D. Wolfe ([jared.wolfe@usask.ca](mailto:jared.wolfe@usask.ca))

The copyright of individual parts of the supplement might differ from the CC BY 4.0 License.

1  
2  
3

4 **Supplementary Data**

5 **Table S1** – Criteria and steps applied to select a study set of watersheds.

| <b>Variable</b>                                | <b>Threshold Criterion</b>                                                                      | <b>Rationale</b>                                                                                                                                 | <b># watersheds after selection</b> |
|------------------------------------------------|-------------------------------------------------------------------------------------------------|--------------------------------------------------------------------------------------------------------------------------------------------------|-------------------------------------|
| Canadian watersheds within the prairie ecozone | Dataset constrained to watersheds completely contained within the prairie ecozone.              | Focus candidate watersheds to the study region.                                                                                                  | 4729                                |
| Watershed area                                 | Removed watershed with area greater than 4000 km <sup>2</sup> and less than 5 km <sup>2</sup> . | Remove large and small watersheds to constrain the area of the watersheds included in analysis.                                                  | 4359                                |
| Urban area                                     | Removed watersheds where area of urban land greater than 40%.                                   | Restrict candidate watersheds to those not highly impacted by urban development and infrastructure.                                              | 4329                                |
| Lake                                           | Removed watersheds designated as entirely lake or reservoir (from HydroSHEDs dataset).          | A binary variable coded in original dataset. We focused our analysis on terrestrial systems and thus removed those designated as lakes.          | 4180                                |
| Water area                                     | Removed watershed where water area greater than 90%.                                            | Second cleaning step to remove watersheds where a majority of area was inundated but not coded explicitly (as lake or reservoir) in the dataset. | 4175                                |

6  
7

8 **Table S2** – Types and sources of data used in cluster analysis.

| <b>Data</b>                      | <b>Dataset</b>                         | <b>Agency</b>           | <b>Reference</b>                                             |
|----------------------------------|----------------------------------------|-------------------------|--------------------------------------------------------------|
| Watersheds                       | HydroSHEDs                             | Academic                | Lehner and Grill (2013)                                      |
| Climate                          | CANGRID                                | Government              | ECCC (2017)                                                  |
| Flow data                        | HYDAT stations, Water Survey of Canada | Government              | ECCC (2016)                                                  |
| Water extent                     | Global Surface Water                   | Academic                | Pekel et al. (2016)                                          |
| Streams                          | Canvec series                          | Government              | NRC (2016)                                                   |
| Surficial geology                | -                                      | Government (Provincial) | Atkinson et al. (2017), Matile et al. (2006), Simpson (2008) |
| Soil particle size classes, zone | Detailed Soil Survey                   | Government              | AAFC (2013, 2015)                                            |
| Land cover                       | Annual Crop Inventory 2016             | Government              | AAFC (2016)                                                  |
| Tillage practice                 | Census of Agriculture (2011, 2016)     | Government              | Statistics Canada (2016)                                     |

9

10 **Table S3** – Components of compositional datasets. The physiographic dataset is shown in  
 11 addition to the various classifications and components considered.

| <b>Dataset</b>    | <b>Components</b>                                                                                                                                                               |
|-------------------|---------------------------------------------------------------------------------------------------------------------------------------------------------------------------------|
| Surficial geology | Alluvial deposits<br>Colluvial deposits<br>Eolian deposits<br>Glacial till deposits<br>Glaciolacustrine deposits<br>Glaciofluvial deposits<br>Organic deposits<br>Rock deposits |
| Soil zone         | Dark grey<br>Grey<br>Black<br>Dark brown<br>Brown                                                                                                                               |
| Surface landform  | Dissected<br>Level<br>Hummocky<br>Rolling<br>Undulating                                                                                                                         |
| Land cover        | Forest<br>Shrubland<br>Grassland<br>Pasture<br>Cropland<br>Fallow land                                                                                                          |

12

13 **Table S4** – Mean and range of agreement of watersheds in the resampling and re-classifying  
14 analysis to the classification in Fig. 5. The minimum and maximum percent agreement are shown  
15 in parentheses.

| <b>Class</b> | <b>Percent agreement</b> |
|--------------|--------------------------|
| 1            | 84.0 (50.0-100)          |
| 2            | 97.4 (12.5-100)          |
| 3            | 86.5 (22.2-100)          |
| 4            | 53.4 (0.0-83.3)          |
| 5            | 96.5 (22.2-100)          |
| 6            | 98.7 (33.3-100)          |
| 7            | 97.8 (55.6-100)          |

16

17

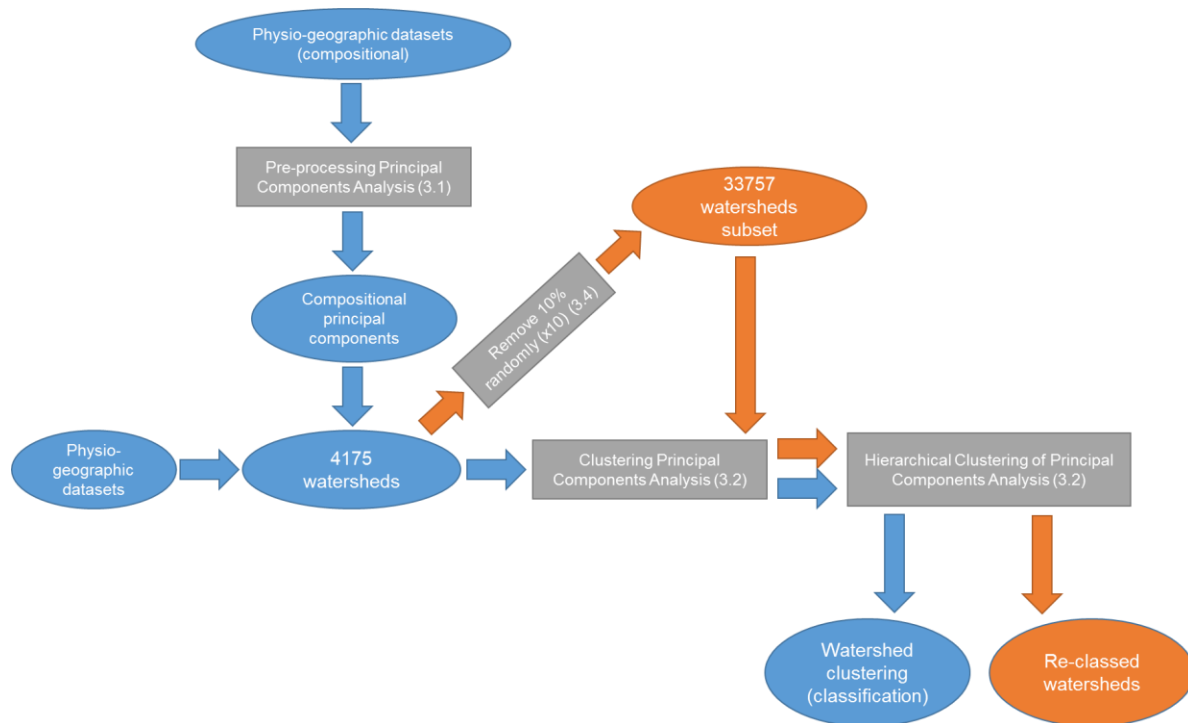

18

19 **Figure S1** – Workflow diagram of the clustering and classification of watersheds procedure. Diagram  
 20 depicts the transformation and incorporation of watershed physio-geographic characteristic into the  
 21 Hierarchical clustering analysis and the identification of classes. Circles depict datasets, and squares show  
 22 the analysis steps. The numbers in parentheses indicate sections of main text describing the analysis  
 23 procedure. Blue shows the flow of the clustering and classification of the complete watershed dataset.  
 24 Orange shows the flow of the re-classifying procedure on the subsets of watersheds, which was repeated  
 25 ten times.

26

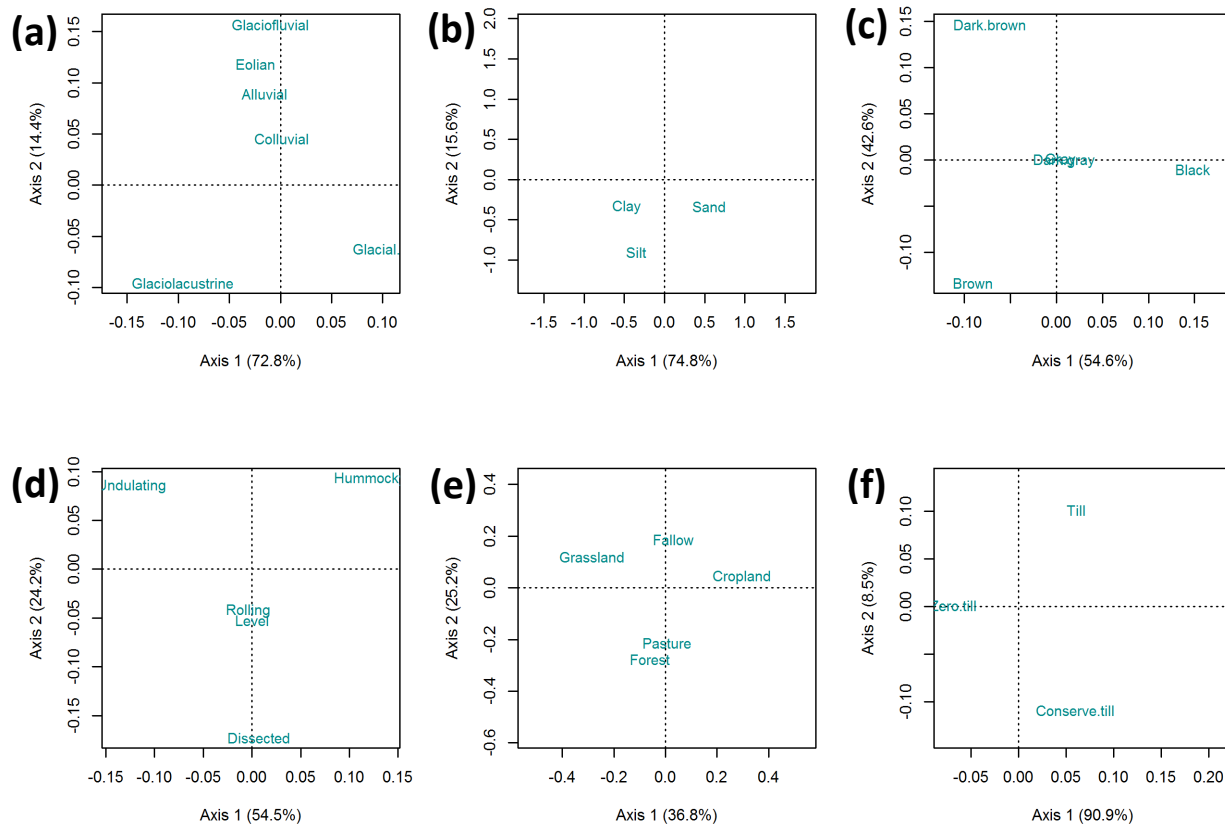

28

29 **Figure S2** – Principal components analysis ordinations of compositional datasets: (a) surficial  
 30 geology, (b) particle size class, (c) soil zone, (d) surface land form, (e) land cover, and (f) tillage  
 31 practice. The percentage of variation explained by each axis is shown. Note that the variables at  
 32 the centre of plot (c) are “dark gray” and “gray” soil zones and are not well represented by Axis  
 33 1 and Axis 2.

34

35

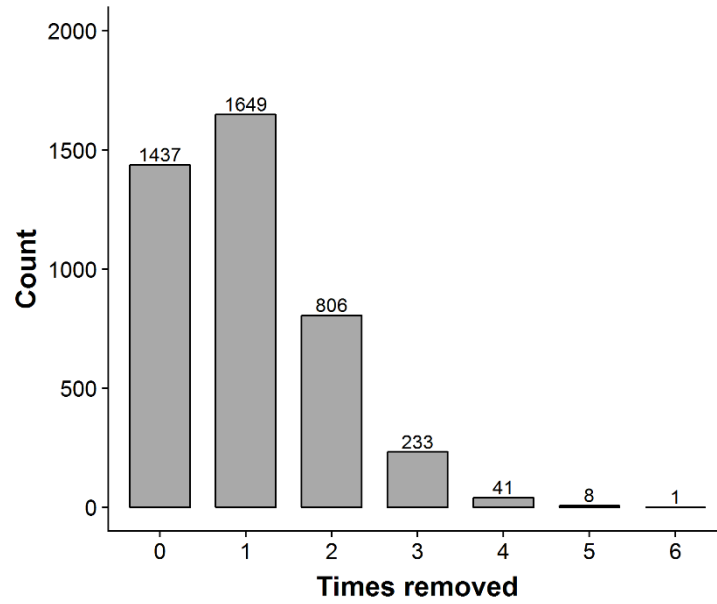

36

37 **Figure S3** – Number of times an individual watershed was removed over ten iterations during  
38 the re-sampling and validation procedure. The number above bars designates the count of  
39 watersheds in each category.

40



41

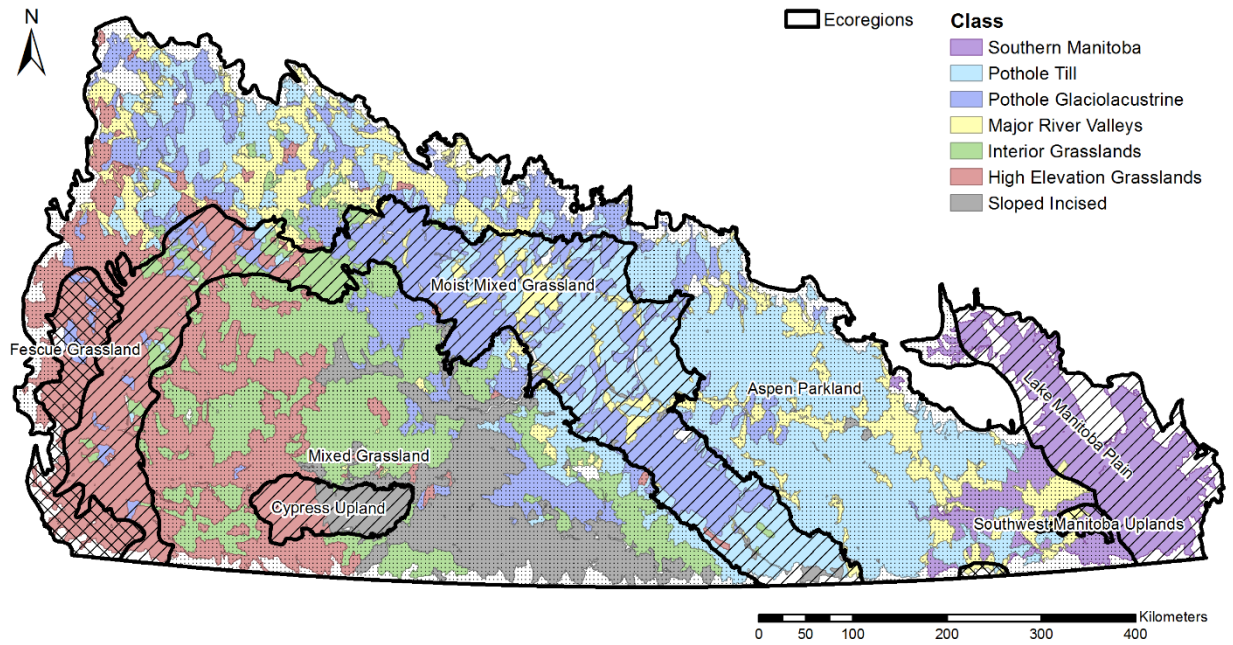

42

43

44

45 **Figure S4** – Map of the study domain comparing the watershed classes to ecoregion boundaries.  
46 Delineation of ecoregions are based on those from the Ecological Working Group (1995) of  
47 Canada.
